# Supplementary material for: Transcutaneous Neuromodulation for Constipation and Fecal Incontinence in Children: A Systematic Review and Meta-Analysis
Source: MDPI journal article supplement (doi:10.3390/life13020430), 2023-02-02
Supplement: s1 [file s1]

## Characteristics of excluded studies [ordered by study ID]

| Study                             | Reason for exclusion                                                                                                                                                                                                                                                                                                                          |
|-----------------------------------|-----------------------------------------------------------------------------------------------------------------------------------------------------------------------------------------------------------------------------------------------------------------------------------------------------------------------------------------------|
| <u>Chase</u><br><u>2005</u> [2]   | <p>This was a single-group pilot study of eight children (7-16 years) assessing the effects of TESIC in children who had chronic treatment-resistant constipation and soiling who had failed various treatment options</p> <p>Excluded on the basis of study design</p>                                                                       |
| <u>Chase</u><br><u>2009</u> [3]   | <p>This was a non-randomised pilot study that assessed the effectiveness of daily home TESIC in improving the bowel habits of children with slow-transit constipation</p> <p>This study recruited children who were poor responders in a previous RCT on TESIC and slow-transit constipation</p> <p>Excluded on the basis of study design</p> |
| <u>Clarke</u><br><u>2012</u> [4]  | <p>This was a non-randomised single-group before-and-after study evaluating the colonic propagating sequence of a group of children with slow-transit-constipation following the application of TESIC</p> <p>Excluded on the basis of study design</p>                                                                                        |
| <u>Dwyer</u><br><u>2014</u> [5]   | <p>A prospective cohort study that evaluated the use of sacral neuro-modulation in children with dysfunctional elimination syndrome, which included bowel or bladder dysfunction</p> <p>Excluded on the basis on study design and population assessed</p>                                                                                     |
| <u>Ismail</u><br><u>2009</u> [3]  | <p>A non-randomised follow-up study that evaluated the effectiveness of daily TES application at home in participants who responded poorly to thrice-weekly application of TES in an RCT</p> <p>Excluded on the basis of study design</p>                                                                                                     |
| <u>Moeller</u><br><u>2015</u> [1] | <p>A randomised double-blind controlled trial that evaluated the acute effect of transcutaneous electrical nerve stimulation on rectal motility in children with overactive bladder</p> <p>Excluded on the basis of population</p>                                                                                                            |
| <u>Thomas</u><br><u>2013</u> [6]  | <p>A literature review assessing the effect of sacral nerve stimulation in adults and children with slow-transit constipation</p> <p>Excluded on the basis of article type</p>                                                                                                                                                                |
| <u>Iacona</u><br><u>2019</u> [12] | <p>A systematic review of the literature on the use of neuromodulation in children for constipation and soiling refractory to medical treatment.</p> <p>Excluded based on article type</p>                                                                                                                                                    |

| Study                     | Reason for exclusion                                                                                                                                                                                                                                                                                                                                                       |
|---------------------------|----------------------------------------------------------------------------------------------------------------------------------------------------------------------------------------------------------------------------------------------------------------------------------------------------------------------------------------------------------------------------|
| <u>R. T. Ng 2016 [13]</u> | <p>A systematic review of the literature evaluating the efficacy and safety of TENS (Transcutaneous electrical nerve stimulation) when used to improve bowel function and constipation-related symptoms in children with constipation.</p> <p>Excluded based on article type</p>                                                                                           |
| <u>Yik 2012a [7]</u>      | <p>This was a non-randomised single-group before-and-after study that evaluated the colonic propagating sequence of a group of children with slow-transit-constipation following the application of TESIC</p> <p>Excluded on the basis of study design</p>                                                                                                                 |
| <u>Yik 2012b [8]</u>      | <p>This was a non-randomised single-group before-and-after study that evaluated the clinical symptoms of a group of children with slow-transit-constipation following the application of daily TES at home in addition to laxative treatment</p> <p>Excluded on the basis of study design</p>                                                                              |
| <u>Yik 2012c [9]</u>      | <p>This retrospective audit aimed to determine if TES use affected appendicostomy formation rates</p> <p>Excluded on the basis of study design</p>                                                                                                                                                                                                                         |
| <u>Yik 2013a [10]</u>     | <p>A single-group before-and-after study that assessed the effects of TES delivered initially in the physical therapist's clinic for 4 weeks then at home in 62 children with clinical symptoms related to constipation</p> <p>Published in abstract form</p> <p>Excluded on the basis of study design</p>                                                                 |
| <u>Yik 2013b [11]</u>     | <p>A single-group non-comparative study that assessed the effects of TES initially at physical therapist's clinic for 4 weeks then at home for 3-6 months in 62 children with clinical symptoms related to constipation</p> <p>Published in abstract form</p> <p>The data set reported were similar to (<u>Yik 2013a</u>)</p> <p>Excluded on the basis of study design</p> |

TESIC: transcutaneous electrical stimulation using interferential current.

TES: transcutaneous electrical stimulation.

## References to studies excluded from this review

- [1] I. Moeller Joensson, S. Hagstroem, C. Siggaard, W. Bower, J. C. Djurhuus, e K. Krogh, “Transcutaneous Electrical Nerve Stimulation Increases Rectal Activity in Children”, *J Pediatr Gastroenterol Nutr*, vol. 61, n° 1, p. 80–84, 2015, doi: 10.1097/MPG.0000000000000802.
- [2] J. Chase, V. J. Robertson, B. Southwell, J. Hutson, e S. Gibb, “Pilot study using transcutaneous electrical stimulation (interferential current) to treat chronic treatment-resistant constipation and soiling in children”, *J. Gastroenterol. Hepatol.*, vol. 20, n° 7, p. 1054–1061, 2005, doi: 10.1111/J.1440-1746.2005.03863.X.
- [3] K. A. Ismail *et al.*, “Daily transabdominal electrical stimulation at home increased defecation in children with slow-transit constipation: a pilot study”, *J. Pediatr. Surg.*, vol. 44, n° 12, p. 2388–2392, dez. 2009, doi: 10.1016/J.JPESURG.2009.07.063.
- [4] M. C. Clarke *et al.*, “Transabdominal electrical stimulation increases colonic propagating pressure waves in paediatric slow transit constipation”, *J Pediatr Surg*, vol. 47, n° 12, p. 2279–2284, 2012, doi: 10.1016/j.jpedsurg.2012.09.021.
- [5] M. E. Dwyer, D. R. Vandersteen, P. Hollatz, e Y. E. Reinberg, “Sacral neuromodulation for the dysfunctional elimination syndrome: a 10-year single-center experience with 105 consecutive children”, *Urology*, vol. 84, n° 4, p. 911–918, out. 2014, doi: 10.1016/J.UROLOGY.2014.03.059.
- [6] G. P. Thomas, T. C. Dudding, G. Rahbour, R. J. Nicholls, e C. J. Vaizey, “Sacral nerve stimulation for constipation”, 2012, doi: 10.1002/bjs.8944.
- [7] Y. I. Yik, K. A. Ismail, J. M. Hutson, e B. R. Southwell, “Home transcutaneous electrical stimulation to treat children with slow-transit constipation”, *J Pediatr Surg*, vol. 47, n° 6, p. 1285–1290, 2012, doi: 10.1016/j.jpedsurg.2012.03.037.
- [8] Y. I. Yik, L. C. Y. Leong, J. M. Hutson, e B. R. Southwell, “The impact of transcutaneous electrical stimulation therapy on appendicostomy operation rates for children with chronic constipation--a single-institution experience”, *J. Pediatr. Surg.*, vol. 47, n° 7, p. 1421–1426, jul. 2012, doi: 10.1016/J.JPESURG.2012.01.017.
- [9] Y. I. Yik, K. A. Ismail, J. M. Hutson, e B. R. Southwell, “Tu1366 Daily Transabdominal Electrical Stimulation Reduces Soiling in Children With Slow-Transit Constipation”, *Gastroenterology*, vol. 142, n° 5, p. S-812, maio 2012, doi: 10.1016/S0016-

5085(12)63160-6.

- [10] Yik YI, Ismail K, Hutson J, Southwell B. Home-based transabdominal electrical stimulation slowly improves treatment-resistant chronic constipation in children. *Neuromodulation*. 2013;16:e102.
- [11] Yik YI, Ismail KA, Hutson JM, Southwell BR. Transabdominal electrical stimulation using interferential current is able to treat chronic constipation in children. *Neuromodulation*. 2013;16:e13.
- [12] R. Iacona, L. Ramage, e G. Malakounides, “Current State of Neuromodulation for Constipation and Fecal Incontinence in Children: A Systematic Review”, *Eur J Pediatr Surg*, vol. 29, n° 6, p. 495–503, 2019, doi: 10.1055/s-0038-1677485.
- [13] R. T. Ng, W. S. Lee, H. L. Ang, K. M. Teo, Y. I. Yik, e N. M. Lai, “Transcutaneous electrical stimulation (TES) for treatment of constipation in children”, *Cochrane Database Syst. Rev.*, 2016, doi: 10.1002/14651858.cd010873.pub4
- [14] Southwell B. Transabdominal electrical stimulation to treat slow transit constipation in children. *Neuromodulation* 2012;15:63.
